# Supplementary material
Source: ML conference proceedings conference paper supplement (https://proceedings.neurips.cc/paper_files/paper/2015/hash/eba0dc302bcd9a273f8bbb72be3a687b-Abstract.html)
Supplement: Supplementary file [file eba0dc302bcd9a273f8bbb72be3a687b-Supplemental.zip]

## A Notation

### A.1 Basic Definitions and Notation

Here we do a brief recap of notation. We assume that we are given a target hypothesis class  $\mathcal{H}$  of VC dimension  $d$ , and a difference hypothesis class  $\mathcal{H}^{df}$  of VC dimension  $d'$ .

We are given access to an unlabeled distribution  $U$  and two labeling oracles  $O$  and  $W$ . Querying  $O$  (resp.  $W$ ) with an unlabeled data point  $x_i$  generates a label  $y_{i,O}$  (resp.  $y_{i,W}$ ) which is drawn from the distribution  $\mathbb{P}_O(y|x_i)$  (resp.  $\mathbb{P}_W(y|x_i)$ ). In general these two distributions are different. We use the notation  $\mathcal{D}$  to denote the joint distribution over examples and labels from  $O$  and  $W$ :

$$\mathbb{P}_{\mathcal{D}}(x, y_O, y_W) = \mathbb{P}_U(x) \mathbb{P}_O(y_O|x) \mathbb{P}_W(y_W|x)$$

Our goal in this paper is to learn a classifier in  $\mathcal{H}$  which has low error with respect to the data distribution  $D$  described as:  $\mathbb{P}_D(x, y) = \mathbb{P}_U(x) \mathbb{P}_O(y|x)$  and our goal is use queries to  $W$  to reduce the number of queries to  $O$ . We use  $y_O$  to denote the labels returned by  $O$ ,  $y_W$  to denote the labels returned by  $W$ .

The error of a classifier  $h$  under a labeled data distribution  $Q$  is defined as:  $\text{err}_Q(h) = \mathbb{P}_{(x,y) \sim Q}(h(x) \neq y)$ ; we use the notation  $\text{err}(h, S)$  to denote its empirical error on a labeled data set  $S$ . We use the notation  $h^*$  to denote the classifier with the lowest error under  $D$ . Define the excess error of  $h$  with respect to distribution  $D$  as  $\text{err}_D(h) - \text{err}_D(h^*)$ . For a set  $Z$ , we occasionally abuse notation and use  $Z$  to also denote the uniform distribution over the elements of  $Z$ .

**Confidence Sets and Disagreement Region.** Our active learning algorithm will maintain a  $(1 - \delta)$ -confidence set for  $h^*$  throughout the algorithm. A set of classifiers  $V \subseteq \mathcal{H}$  produced by a (possibly randomized) algorithm is said to be a  $(1 - \delta)$ -confidence set for  $h^*$  if  $h^* \in V$  with probability  $\geq 1 - \delta$ ; here the probability is over the randomness of the algorithm as well as the choice of all labeled and unlabeled examples drawn by it.

Given two classifiers  $h_1$  and  $h_2$  the disagreement between  $h_1$  and  $h_2$  under an unlabeled data distribution  $U$ , denoted by  $\rho_U(h_1, h_2)$ , is  $\mathbb{P}_{x \sim U}(h_1(x) \neq h_2(x))$ . Given an unlabeled dataset  $S$ , the empirical disagreement of  $h_1$  and  $h_2$  on  $S$  is denoted by  $\rho_S(h_1, h_2)$ . Observe that the disagreements under  $U$  form a pseudometric over  $\mathcal{H}$ . We use  $B_U(h, r)$  to denote a ball of radius  $r$  centered around  $h$  in this metric. The *disagreement region* of a set  $V$  of classifiers, denoted by  $\text{DIS}(V)$ , is the set of all examples  $x \in \mathcal{X}$  such that there exist two classifiers  $h_1$  and  $h_2$  in  $V$  for which  $h_1(x) \neq h_2(x)$ .

**Disagreement Region.** We denote the disagreement region of a disagreement ball of radius  $r$  centered around  $h^*$  by

$$\Delta(r) := \text{DIS}(B(h^*, r)) \quad (7)$$

**Concentration Inequalities.** Suppose  $Z$  is a dataset consisting of  $n$  iid samples from a distribution  $D$ . We will use the following result, which is obtained from a standard application of the normalized VC inequality. With probability  $1 - \delta$  over the random draw of  $Z$ , for all  $h, h' \in \mathcal{H}$ ,

$$\begin{aligned} & |(\text{err}(h, Z) - \text{err}(h', Z)) - (\text{err}_D(h) - \text{err}_D(h'))| \\ & \leq \min(\sqrt{\sigma(n, \delta) \rho_Z(h, h')} + \sigma(n, \delta), \sqrt{\sigma(n, \delta) \rho_D(h, h')} + \sigma(n, \delta)) \end{aligned} \quad (8)$$

$$\begin{aligned} & |(\text{err}(h, Z) - \text{err}_D(h))| \\ & \leq \min(\sqrt{\sigma(n, \delta) \text{err}(h, Z)} + \sigma(n, \delta), \sqrt{\sigma(n, \delta) \text{err}_D(h)} + \sigma(n, \delta)) \end{aligned} \quad (9)$$

where  $d$  is the VC dimension of  $\mathcal{H}$  and the notation  $\sigma(n, \delta)$  is defined as:

$$\sigma(n, \delta) = \frac{8}{n} (2d \ln \frac{2en}{d} + \ln \frac{24}{\delta}) \quad (10)$$

Equation (8) loosely implies the following equation:

$$|(\text{err}(h, Z) - \text{err}(h', Z)) - (\text{err}_D(h) - \text{err}_D(h'))| \leq \sqrt{4\sigma(n, \delta)} \quad (11)$$

The following is a consequence of standard Chernoff bounds. Let  $X_1, \dots, X_n$  be iid Bernoulli random variables with mean  $p$ . If  $\hat{p} = \sum_i X_i/n$ , then with probability  $1 - \delta$ ,

$$|\hat{p} - p| \leq \min(\sqrt{p\gamma(n, \delta)} + \gamma(n, \delta), \sqrt{\hat{p}\gamma(n, \delta)} + \gamma(n, \delta)) \quad (12)$$

where the notation  $\gamma(n, \delta)$  is defined as:

$$\gamma(n, \delta) = \frac{4}{n} \ln \frac{2}{\delta} \quad (13)$$

Equation (12) loosely implies the following equation:

$$|\hat{p} - p| \leq \sqrt{4\gamma(n, \delta)} \quad (14)$$

Using the notation we just introduced, we can rephrase Assumption 1 as follows. For any  $r, \eta > 0$ , there exists an  $h_{\eta, r}^{df} \in \mathcal{H}^{df}$  with the following properties:

$$\begin{aligned} \mathbb{P}_{\mathcal{D}}(h_{\eta, r}^{df}(x) = -1, x \in \Delta(r), y_O \neq y_W) &\leq \eta \\ \mathbb{P}_{\mathcal{D}}(h_{\eta, r}^{df}(x) = 1, x \in \Delta(r)) &\leq \alpha(r, \eta) \end{aligned}$$

We end with an useful fact about  $\sigma(n, \delta)$ .

**Fact 1.** *The minimum  $n$  such that  $\sigma(n, \delta/(\log n(\log n + 1))) \leq \varepsilon$  is at most*

$$\frac{64}{\varepsilon} \left( d \ln \frac{512}{\varepsilon} + \ln \frac{24}{\delta} \right)$$

## A.2 Adaptive Procedure for Estimating Probability Mass

For completeness, we describe in Algorithm 3 a standard doubling procedure for estimating the bias of a coin within a constant factor. This procedure is used by Algorithm 2 to estimate the probability mass of the disagreement region of the current confidence set based on unlabeled examples drawn from  $U$ .

---

### Algorithm 3 Adaptive Procedure for Estimating the Bias of a Coin

---

- 1: Input: failure probability  $\delta$ , an oracle  $\mathcal{O}$  which returns iid Bernoulli random variables with unknown bias  $p$ .
  - 2: Output:  $\hat{p}$ , an estimate of bias  $p$  such that  $\hat{p} \leq p \leq 2\hat{p}$  with probability  $\geq 1 - \delta$ .
  - 3: **for**  $i = 1, 2, \dots$  **do**
  - 4:     Call the oracle  $\mathcal{O}$   $2^i$  times to get empirical frequency  $\hat{p}_i$ .
  - 5:     **if**  $\sqrt{\frac{4 \ln \frac{4 \cdot 2^i}{\delta}}{2^i}} \leq \hat{p}_i/3$  **then return**  $\hat{p} = \frac{2\hat{p}_i}{3}$
  - 6:     **end if**
  - 7: **end for**
- 

**Lemma 1.** *Suppose  $p > 0$  and Algorithm 3 is run with failure probability  $\delta$ . Then with probability  $1 - \delta$ , (1) the output  $\hat{p}$  is such that  $\hat{p} \leq p \leq 2\hat{p}$ . (2) The total number of calls to  $\mathcal{O}$  is at most  $O(\frac{1}{p^2} \ln \frac{1}{\delta p})$ .*

*Proof.* Consider the event

$$E = \{ \text{for all } i \in \mathbb{N}, |\hat{p}_i - p| \leq \sqrt{\frac{4 \ln \frac{4 \cdot 2^i}{\delta}}{2^i}} \}$$

By Equation (14) and union bound,  $\mathbb{P}(E) \geq 1 - \delta$ . On event  $E$ , we claim that if  $i$  is large enough that

$$4\sqrt{\frac{4 \ln \frac{4 \cdot 2^i}{\delta}}{2^i}} \leq p \quad (15)$$

then the condition in line 5 will be met. Indeed, this implies

$$\sqrt{\frac{4 \ln \frac{4 \cdot 2^i}{\delta}}{2^i}} \leq \frac{p - \sqrt{\frac{4 \ln \frac{4 \cdot 2^i}{\delta}}{2^i}}}{3} \leq \frac{\hat{p}_i}{3}$$

Define  $i_0$  as the smallest number  $i$  such that Equation (15) is true. Then by algebra,  $2^{i_0} = O(\frac{1}{p^2} \ln \frac{1}{\delta p})$ .

Hence the number of calls to oracle  $\mathcal{O}$  is at most  $1 + 2 + \dots + 2^{i_0} = O(\frac{1}{p^2} \ln \frac{1}{\delta p})$ .

Consider the smallest  $i^*$  such that the condition in line 5 is met. We have that

$$\sqrt{\frac{4 \ln \frac{4 \cdot 2^{i^*}}{\delta}}{2^{i^*}}} \leq \hat{p}_{i^*}/3$$

By the definition of  $E$ ,

$$|p - \hat{p}_{i^*}| \leq \hat{p}_{i^*}/3$$

that is,  $2\hat{p}_{i^*}/3 \leq p \leq 4\hat{p}_{i^*}/3$ , implying  $\hat{p} \leq p \leq 2\hat{p}$ .  $\square$

### A.3 Notations on Datasets

Without loss of generality, assume the examples drawn throughout Algorithm 1 have distinct feature values  $x$ , since this happens with probability 1 under mild assumptions.

Algorithm 1 uses a mixture of three kinds of labeled data to learn a target classifier – labels obtained from querying  $\mathcal{O}$ , labels inferred by the algorithm, and labels obtained from querying  $W$ . To analyze the effect of these three kinds of labeled data, we need to introduce some notation.

Recall that we define the joint distribution  $\mathcal{D}$  over examples and labels both from  $\mathcal{O}$  and  $W$  as follows:

$$\mathbb{P}_{\mathcal{D}}(x, y_{\mathcal{O}}, y_W) = \mathbb{P}_U(x) \mathbb{P}_{\mathcal{O}}(y_{\mathcal{O}}|x) \mathbb{P}_W(y_W|x)$$

where given an example  $x$ , the labels generated by  $\mathcal{O}$  and  $W$  are conditionally independent.

A dataset  $\hat{S}$  with empirical error minimizer  $\hat{h}$  and a rejection threshold  $\tau$  define an implicit confidence set for  $h^*$  as follows:

$$V(\hat{S}, \tau) = \{h : \text{err}(h, \hat{S}) - \text{err}(\hat{h}, \hat{S}) \leq \tau\}$$

At the beginning of epoch  $k$ , we have  $\hat{S}_{k-1}$ .  $\hat{h}_{k-1}$  is defined as the empirical error minimizer of  $\hat{S}_{k-1}$ . The disagreement region of the implicit confidence set at epoch  $k$ ,  $R_{k-1}$  is defined as  $R_{k-1} := \text{DIS}(V(\hat{S}_{k-1}, 3\epsilon_k/2))$ . Algorithm 4 **in-disagr-region**( $\hat{S}_{k-1}, 3\epsilon_k/2, x$ ) provides a test deciding if an unlabeled example  $x$  is inside  $R_{k-1}$  in epoch  $k$ . (See Lemma 6.)

Define  $\mathcal{A}_k$  to be the distribution  $\mathcal{D}$  conditioned on the set  $\{(x, y_{\mathcal{O}}, y_W) : x \in R_{k-1}\}$ . At epoch  $k$ , Algorithm 2 has inputs distribution  $U$ , oracles  $W$  and  $\mathcal{O}$ , target false negative error  $\epsilon = \epsilon_k/128$ , hypothesis class  $\mathcal{H}^{df}$ , confidence  $\delta = \delta_k/2$ , previous labeled dataset  $\hat{S}_{k-1}$ , and outputs a difference classifier  $\hat{h}_k^{df}$ . By the setting of  $m$  in Equation (1), Algorithm 2 first computes  $\hat{p}_k$  using unlabeled examples drawn from  $U$ , which is an estimator of  $\mathbb{P}_{\mathcal{D}}(x \in R_{k-1})$ . Then it draws a subsample of size

$$m_{k,1} = \frac{64 \cdot 1024 \hat{p}_k}{\epsilon_k} (d \ln \frac{512 \cdot 1024 \hat{p}_k}{\epsilon_k} + \ln \frac{144}{\delta_k}) \quad (16)$$

iid from  $\mathcal{A}_k$ . We call the resulting dataset  $\mathcal{A}'_k$ .

At epoch  $k$ , Algorithm 5 performs adaptive subsampling to refine the implicit  $(1 - \delta)$ -confidence set. For each round  $t$ , it subsamples  $U$  to get an unlabeled dataset  $S_k^{t,U}$  of size  $2^t$ . Define the corresponding (hypothetical) dataset with labels queried from both  $W$  and  $\mathcal{O}$  as  $\mathcal{S}'_k$ .  $S'_k$ , the (hypothetical) dataset with labels queried from  $\mathcal{O}$ , is defined as:

$$S'_k = \{(x, y_{\mathcal{O}}) | (x, y_{\mathcal{O}}, y_W) \in \mathcal{S}'_k\}$$

In addition to obtaining labels from  $\mathcal{O}$ , the algorithm obtains labels in two other ways. First, if an  $x \in \mathcal{X} \setminus R_{k-1}$ , then its label is safely inferred and with high probability, this inferred label  $\hat{h}_{k-1}(x)$  is equal to  $h^*(x)$ . Second, if an  $x$  lies in  $R_{k-1}$  but if the difference classifier  $\hat{h}_k^{df}$  predicts agreement

between  $O$  and  $W$ , then its label is obtained by querying  $W$ . The actual dataset  $\hat{S}_k^t$  generated by Algorithm 5 is defined as:

$$\begin{aligned}\hat{S}_k^t = & \{(x, \hat{h}_{k-1}(x)) | (x, y_O, y_W) \in \mathcal{S}_k^t, x \notin R_{k-1}\} \cup \{(x, y_O) | (x, y_O, y_W) \in \mathcal{S}_k^t, x \in R_{k-1}, \hat{h}_k^{df}(x) = +1\} \\ & \cup \{(x, y_W) | (x, y_O, y_W) \in \mathcal{S}_k^t, x \in R_{k-1}, \hat{h}_k^{df}(x) = -1\}\end{aligned}$$

We use  $\hat{D}_k$  to denote the labeled data distribution as follows:

$$\begin{aligned}\mathbb{P}_{\hat{D}_k}(x, y) &= \mathbb{P}_U(x) \mathbb{P}_{\hat{Q}_k}(y|x) \\ \mathbb{P}_{\hat{Q}_k}(y|x) &= \begin{cases} I(\hat{h}_{k-1}(x) = y), & x \notin R_{k-1} \\ \mathbb{P}_O(y|x), & x \in R_{k-1}, \hat{h}_k^{df}(x) = +1 \\ \mathbb{P}_W(y|x), & x \in R_{k-1}, \hat{h}_k^{df}(x) = -1 \end{cases}\end{aligned}$$

Therefore,  $\hat{S}_k^t$  can be seen as a sample of size  $2^t$  drawn iid from  $\hat{D}_k$ .

Observe that  $\hat{h}_k^t$  is obtained by training an ERM classifier over  $\hat{S}_k^t$ , and  $\delta_k^t = \delta_k/2^t(t+1)$ .

Suppose Algorithm 5 stops at iteration  $t_0(k)$ , then the final dataset returned is  $\hat{S}_k = \hat{S}_k^{t_0(k)}$ , with a total number of  $m_{k,2}$  label requests to  $O$ . We define  $S_k = S_k^{t_0(k)}$ ,  $\mathcal{S}_k = \mathcal{S}_k^{t_0(k)}$  and  $\sigma_k = \sigma(2^{t_0(k)}, \delta_k^{t_0(k)})$ .

For  $k = 0$ , we define the notation  $\hat{S}_k$  differently.  $\hat{S}_0$  is the dataset drawn iid at random from  $D$ , with labels queried entirely to  $O$ . For notational convenience, define  $S_0 = \hat{S}_0$ .  $\sigma_0$  is defined as  $\sigma_0 = \sigma(n_0, \delta_0)$ , where  $\sigma(\cdot, \cdot)$  is defined by Equation (10) and  $n_0$  is defined as:

$$n_0 = (64 \cdot 1024^2)(2d \ln(512 \cdot 1024^2) + \ln \frac{96}{\delta})$$

Recall that  $\hat{h}_k = \arg\min_{h \in \mathcal{H}} \text{err}(h, \hat{S}_k)$  is the empirical error minimizer with respect to the dataset  $\hat{S}_k$ .

Note that the empirical distance  $\rho_Z(\cdot, \cdot)$  does not depend on the labels in dataset  $Z$ , therefore,  $\rho_{\hat{S}_k}(h, h') = \rho_{S_k}(h, h')$ . We will use them interchangeably throughout.

#### A.4 Events

Recall that  $\delta_k = \delta/(4(k+1)^2)$ ,  $\epsilon_k = 2^{-k}$ .

Define

$$h_k^{df} = h_{2v+\epsilon_{k-1}, \epsilon_k/512}^{df}$$

where the notation  $h_{r,\eta}^{df}$  is introduced in Assumption 1.

We begin by defining some events that we will condition on later in the proof, and showing that these events occur with high probability.

Define event

$$\begin{aligned}E_k^1 := & \left\{ \begin{aligned} & \mathbb{P}_{\mathcal{D}}(x \in R_{k-1})/2 \leq \hat{p}_k \leq \mathbb{P}_{\mathcal{D}}(x \in R_{k-1}), \\ & \text{and For all } h^{df} \in \mathcal{H}^{df}, \\ & |\mathbb{P}_{\mathcal{A}'_k}(h^{df}(x) = -1, y_O \neq y_W) - \mathbb{P}_{\mathcal{A}_k}(h^{df}(x) = -1, y_O \neq y_W)| \leq \frac{\epsilon_k}{1024 \mathbb{P}_{\mathcal{D}}(x \in R_{k-1})} \\ & + \sqrt{\frac{\min(\mathbb{P}_{\mathcal{A}_k}(h^{df}(x) = -1, y_O \neq y_W), \mathbb{P}_{\mathcal{A}'_k}(h^{df}(x) = -1, y_O \neq y_W))}{1024 \mathbb{P}_{\mathcal{D}}(x \in R_{k-1})}} \frac{\epsilon_k}{1024 \mathbb{P}_{\mathcal{D}}(x \in R_{k-1})} \\ & \text{and } |\mathbb{P}_{\mathcal{A}'_k}(h^{df}(x) = +1) - \mathbb{P}_{\mathcal{A}_k}(h^{df}(x) = +1)| \\ & \leq \sqrt{\frac{\min(\mathbb{P}_{\mathcal{A}_k}(h^{df}(x) = +1), \mathbb{P}_{\mathcal{A}'_k}(h^{df}(x) = +1))}{1024 \mathbb{P}_{\mathcal{D}}(x \in R_{k-1})}} \frac{\epsilon_k}{1024 \mathbb{P}_{\mathcal{D}}(x \in R_{k-1})} + \frac{\epsilon_k}{1024 \mathbb{P}_{\mathcal{D}}(x \in R_{k-1})} \end{aligned} \right\}\end{aligned}$$

**Fact 2.**  $\mathbb{P}(E_k^1) \geq 1 - \delta_k/2$ .

Table 1: Summary of Notations.

| Notation          | Explanation                                                                                                                                                                                                                                           | Samples Drawn from |
|-------------------|-------------------------------------------------------------------------------------------------------------------------------------------------------------------------------------------------------------------------------------------------------|--------------------|
| $\mathcal{D}$     | Joint distribution of $(x, y_W, y_O)$                                                                                                                                                                                                                 | -                  |
| $D$               | Joint distribution of $(x, y_O)$                                                                                                                                                                                                                      | -                  |
| $U$               | Marginal distribution of $x$                                                                                                                                                                                                                          | -                  |
| $O$               | Conditional distribution of $y_O$ given $x$                                                                                                                                                                                                           | -                  |
| $W$               | Conditional distribution of $y_W$ given $x$                                                                                                                                                                                                           | -                  |
| $R_{k-1}$         | Disagreement region at epoch $k$                                                                                                                                                                                                                      | -                  |
| $\mathcal{A}_k$   | Conditional distribution of $(x, y_W, y_O)$ given $x \in R_{k-1}$                                                                                                                                                                                     | -                  |
| $\mathcal{A}'_k$  | Dataset used to train difference classifier at epoch $k$                                                                                                                                                                                              | $\mathcal{A}_k$    |
| $h_k^{df}$        | Difference classifier $h_{2v+\varepsilon_{k-1}, \varepsilon_k/512}^{df}$ , where $h_{\eta, r}$ is defined in Assumption 1                                                                                                                             | -                  |
| $\hat{h}_k^{df}$  | Difference classifier returned by Algorithm 2 at epoch $k$                                                                                                                                                                                            | -                  |
| $S_k^{t,U}$       | unlabeled dataset drawn at iteration $t$ of Algorithm 5 at epoch $k \geq 1$                                                                                                                                                                           | $U$                |
| $\mathcal{S}_k^t$ | $S_k^{t,U}$ augmented by labels from $O$ and $W$                                                                                                                                                                                                      | $\mathcal{D}$      |
| $S_k^t$           | $\{(x, y_O)   (x, y_O, y_W) \in \mathcal{S}_k^t\}$                                                                                                                                                                                                    | $D$                |
| $\hat{S}_k^t$     | Labeled dataset produced at iteration $t$ of Algorithm 5 at epoch $k \geq 1$                                                                                                                                                                          | $\hat{D}_k$        |
| $\hat{D}_k$       | Distribution of $\hat{S}_k^t$ for $k \geq 1$ and any $t$ . Has marginal $U$ over $\mathcal{X}$ . The conditional distribution of $y x$ is $I(h^*(x))$ if $x \notin R_{k-1}$ , $W$ if $x \in R_{k-1}$ and $\hat{h}_k^{df}(x) = -1$ , and $O$ otherwise | -                  |
| $t_0(k)$          | Number of iterations of Algorithm 5 at epoch $k \geq 1$                                                                                                                                                                                               | -                  |
| $\hat{S}_0$       | Initial dataset drawn by Algorithm 1                                                                                                                                                                                                                  | $D$                |
| $\hat{S}_k$       | Dataset finally returned by Algorithm 5 at epoch $k \geq 1$ . Equal to $\hat{S}_k^{t_0(k)}$                                                                                                                                                           | $\hat{D}_k$        |
| $S_k$             | Dataset obtained by replacing all labels in $\hat{S}_k$ by labels drawn from $O$ . Equal to $S_k^{t_0(k)}$                                                                                                                                            | $D$                |
| $\mathcal{S}_k$   | Equal to $\mathcal{S}_k^{t_0(k)}$                                                                                                                                                                                                                     | $\mathcal{D}$      |
| $\hat{h}_k$       | Empirical error minimizer on $\hat{S}_k$                                                                                                                                                                                                              | -                  |

Define event

$$\begin{aligned}
E_k^2 = \Big\{ & \text{For all } t \in \mathbb{N}, \text{ for all } h, h' \in \mathcal{H}, \\
& |(\text{err}(h, S_k^t) - \text{err}(h', S_k^t)) - (\text{err}_D(h) - \text{err}_D(h'))| \leq \sigma(2^t, \delta_k^t) + \sqrt{\sigma(2^t, \delta_k^t) \rho_{S_k^t}(h, h')} \\
\text{and } & \text{err}(h, \hat{S}_k^t) - \text{err}_{\hat{D}_k}(h) \leq \sigma(2^t, \delta_k^t) + \sqrt{\sigma(2^t, \delta_k^t) \text{err}_{\hat{D}_k}(h)} \\
\text{and } & \mathbb{P}_{\mathcal{S}_k^t}(\hat{h}_k^{df}(x) = -1, y_O \neq y_W, x \in R_{k-1}) - \mathbb{P}_{\mathcal{D}}(\hat{h}_k^{df}(x) = -1, y_O \neq y_W, x \in R_{k-1}) \\
& \leq \sqrt{\gamma(2^t, \delta_k^t) \mathbb{P}_{\mathcal{S}_k^t}(\hat{h}_k^{df}(x) = -1, y_O \neq y_W, x \in R_{k-1})} + \gamma(2^t, \delta_k^t) \\
\text{and } & \mathbb{P}_{\mathcal{S}_k^t}(\hat{h}_k^{df}(x) = -1 \cap x \in R_{k-1}) \leq 2(\mathbb{P}_{\mathcal{D}}(\hat{h}_k^{df}(x) = -1, x \in R_{k-1}) + \gamma(2^t, \delta_k^t)) \Big\}
\end{aligned}$$

**Fact 3.**  $\mathbb{P}(E_k^2) \geq 1 - \delta_k/2$ .

We will also use the following definitions of events in our proof. Define event  $F_0$  as

$$F_0 = \left\{ \text{for all } h, h' \in \mathcal{H}, |(\text{err}(h, S_0) - \text{err}(h', S_0)) - (\text{err}_D(h) - \text{err}_D(h'))| \leq \sigma(n_0, \delta_0) + \sqrt{\sigma(n_0, \delta_0) \rho_{S_0}(h, h')} \right\}$$

For  $k \in \{1, 2, \dots, k_0\}$ , event  $F_k$  is defined inductively as

$$F_k = F_{k-1} \cap (E_k^1 \cap E_k^2)$$

**Fact 4.** For  $k \in \{0, 1, \dots, k_0\}$ ,  $\mathbb{P}(F_k) \geq 1 - \delta_0 - \delta_1 - \dots - \delta_k$ . Specifically,  $\mathbb{P}(F_{k_0}) \geq 1 - \delta$ .

The proofs of Facts 2, 3 and 4 are provided in Appendix E.

## B Proof Outline and Main Lemmas

The main idea of the proof is to maintain the following three invariants on the outputs of Algorithm 1 in each epoch. We prove that these invariants hold simultaneously for each epoch with high probability by induction over the epochs. Throughout, for  $k \geq 1$ , the end of epoch  $k$  refers to the end of execution of line 13 of Algorithm 1 at iteration  $k$ . The end of epoch 0 refers to the end of execution of line 5 in Algorithm 1.

Invariant 1 states that if we replace the inferred labels and labels obtained from  $W$  in  $\hat{S}_k$  by those obtained from  $O$  (thus getting the dataset  $S_k$ ), then the excess errors of classifiers in  $\mathcal{H}$  will not decrease by much.

**Invariant 1** (Approximate Favorable Bias). *Let  $h$  be any classifier in  $\mathcal{H}$ , and  $h'$  be another classifier in  $\mathcal{H}$  with excess error on  $D$  no greater than  $\epsilon_k$ . Then, at the end of epoch  $k$ , we have:*

$$\text{err}(h, S_k) - \text{err}(h', S_k) \leq \text{err}(h, \hat{S}_k) - \text{err}(h', \hat{S}_k) + \epsilon_k/16$$

Invariant 2 establishes that in epoch  $k$ , Algorithm 5 selects enough examples so as to ensure that concentration of empirical errors of classifiers in  $\mathcal{H}$  on  $S_k$  to their true errors.

**Invariant 2** (Concentration). *At the end of epoch  $k$ ,  $\hat{S}_k$ ,  $S_k$  and  $\sigma_k$  are such that:*

1. *For any pair of classifiers  $h, h' \in \mathcal{H}$ , it holds that:*

$$|(\text{err}(h, S_k) - \text{err}(h', S_k)) - (\text{err}_D(h) - \text{err}_D(h'))| \leq \sigma_k + \sqrt{\sigma_k \rho_{S_k}(h, h')} \quad (17)$$

2. *The dataset  $\hat{S}_k$  has the following property:*

$$\sigma_k + \sqrt{\sigma_k \text{err}(\hat{h}_k, \hat{S}_k)} \leq \epsilon_k/512 \quad (18)$$

Finally, Invariant 3 ensures that the difference classifier produced in epoch  $k$  has low false negative error on the disagreement region of the  $(1 - \delta)$  confidence set at epoch  $k$ .

**Invariant 3** (Difference Classifier). *At epoch  $k$ , the difference classifier output by Algorithm 2 is such that*

$$\mathbb{P}_{\mathcal{D}}(\hat{h}_k^{df}(x) = -1, y_O \neq y_W, x \in R_{k-1}) \leq \epsilon_k/64 \quad (19)$$

$$\mathbb{P}_{\mathcal{D}}(\hat{h}_k^{df}(x) = +1, x \in R_{k-1}) \leq 6(\alpha(2\nu + \epsilon_{k-1}, \epsilon_k/512) + \epsilon_k/1024) \quad (20)$$

We will show the following property about the three invariants. Its proof is deferred to Subsection B.4.

**Lemma 2.** *There is a numerical constant  $c_0 > 0$  such that the following holds. The collection of events  $\{F_k\}_{k=0}^{k_0}$  is such that for  $k \in \{0, 1, \dots, k_0\}$ :*

(1) *If  $k = 0$ , then on event  $F_k$ , at epoch  $k$ ,*

(1.1) *Invariants 1, 2 hold.*

(1.2) *The number of label requests to  $O$  is at most  $m_0 \leq c_0(d + \ln \frac{1}{\delta})$ .*

(2) *If  $k \geq 1$ , then on event  $F_k$ , at epoch  $k$ ,*

(2.1) *Invariants 1, 2, 3 hold.*

(2.2) *the number of label requests to  $O$  is at most*

$$m_k \leq c_0 \left( \frac{(\alpha(2\nu + \epsilon_{k-1}, \epsilon_k/1024) + \epsilon_k)(\nu + \epsilon_k)}{\epsilon_k^2} d \left( \ln^2 \frac{1}{\epsilon_k} + \ln^2 \frac{1}{\delta_k} \right) + \frac{\mathbb{P}_U(x \in \Delta(2\nu + \epsilon_{k-1}))}{\epsilon_k} \left( d' \ln \frac{1}{\epsilon_k} + \ln \frac{1}{\delta_k} \right) \right)$$

---

**Algorithm 4** *in\_disagr\_region*( $\hat{S}, \tau, x$ ): Test if  $x$  is in the disagreement region of current confidence set

---

```

1: Input: labeled dataset  $\hat{S}$ , rejection threshold  $\tau$ , unlabeled example  $x$ .
2: Output: 1 if  $x$  is in the disagreement region of current confidence set, 0 otherwise.
3: Train  $\hat{h} \leftarrow \text{CONS-LEARN}_{\mathcal{H}}(\{\emptyset, \hat{S}\})$ .
4: Train  $\hat{h}'_x \leftarrow \text{CONS-LEARN}_{\mathcal{H}}(\{(x, -\hat{h}(x))\}, \hat{S})$ .
5: if  $\text{err}(\hat{h}'_x, \hat{S}) - \text{err}(\hat{h}, \hat{S}) > \tau$  then   #  $x$  is in the agreement region
6:   return 0
7: else   #  $x$  is in the disagreement region
8:   return 1
9: end if

```

---

### B.1 Active Label Inference and Identifying the Disagreement Region

We begin by proving some lemmas about Algorithm 4 which identifies if an example lies in the disagreement region of the current confidence set. This is done by using a constrained ERM oracle  $\text{CONS-LEARN}_H(\cdot, \cdot)$  using ideas similar to [9, 14, 3, 4].

**Lemma 3.** *When given as input a dataset  $\hat{S}$ , a threshold  $\tau > 0$ , an unlabeled example  $x$ , Algorithm 4 *in\_disagr\_region* returns 1 if and only if  $x$  lies inside  $\text{DIS}(V(\hat{S}, \tau))$ .*

*Proof.* ( $\Rightarrow$ ) If Algorithm 4 returns 1, then we have found a classifier  $\hat{h}'_x$  such that (1)  $\hat{h}'_x(x) = -\hat{h}(x)$ , and (2)  $\text{err}(\hat{h}'_x, \hat{S}) - \text{err}(\hat{h}, \hat{S}) \leq \tau$ , i.e.  $\hat{h}'_x \in V(\hat{S}, \tau)$ . Therefore,  $x$  is in  $\text{DIS}(V(\hat{S}, \tau))$ .  
( $\Leftarrow$ ) If  $x$  is in  $\text{DIS}(V(\hat{S}, \tau))$ , then there exists a classifier  $h \in \mathcal{H}$  such that (1)  $h(x) = -\hat{h}(x)$  and (2)  $\text{err}(h, \hat{S}) - \text{err}(\hat{h}, \hat{S}) \leq \tau$ . Hence by definition of  $\hat{h}'_x$ ,  $\text{err}(\hat{h}'_x, \hat{S}) - \text{err}(\hat{h}, \hat{S}) \leq \tau$ . Thus, Algorithm 4 returns 1.  $\square$

We now provide some lemmas about the behavior of Algorithm 4 called at epoch  $k$ .

**Lemma 4.** *Suppose Invariants 1 and 2 hold at the end of epoch  $k-1$ . If  $h \in \mathcal{H}$  is such that  $\text{err}_D(h) \leq \text{err}_D(h^*) + \epsilon_{k-1}/2$ , then*

$$\text{err}(h, \hat{S}_{k-1}) - \text{err}(\hat{h}_{k-1}, \hat{S}_{k-1}) \leq 3\epsilon_{k-1}/4$$

*Proof.* If  $h \in \mathcal{H}$  has excess error at most  $\epsilon_{k-1}/2$  with respect to  $D$ , then,

$$\begin{aligned}
& \text{err}(h, \hat{S}_{k-1}) - \text{err}(\hat{h}_{k-1}, \hat{S}_{k-1}) \\
& \leq \text{err}(h, S_{k-1}) - \text{err}(\hat{h}_{k-1}, S_{k-1}) + \epsilon_{k-1}/16 \\
& \leq \text{err}_D(h) - \text{err}_D(\hat{h}_{k-1}) + \sigma_{k-1} + \sqrt{\sigma_{k-1} \rho_{S_{k-1}}(h, \hat{h}_{k-1})} + \epsilon_{k-1}/16 \\
& \leq \epsilon_{k-1}/2 + \sigma_{k-1} + \sqrt{\sigma_{k-1} \rho_{S_{k-1}}(h, \hat{h}_{k-1})} + \epsilon_{k-1}/16 \\
& \leq 9\epsilon_{k-1}/16 + \sigma_{k-1} + \sqrt{\sigma_{k-1} \text{err}(h, \hat{S}_{k-1})} + \sqrt{\sigma_{k-1} \text{err}(\hat{h}_{k-1}, \hat{S}_{k-1})} \\
& \leq 9\epsilon_{k-1}/16 + \sigma_{k-1} + \sqrt{\sigma_{k-1} \text{err}(h, \hat{S}_{k-1})} + \sqrt{\sigma_{k-1} (\text{err}(\hat{h}_{k-1}, \hat{S}_{k-1}) + 9\epsilon_{k-1}/16)}
\end{aligned}$$

Where the first inequality follows from Invariant 1, the second inequality from Equation (17) of Invariant 2, the third inequality from the assumption that  $h$  has excess error at most  $\epsilon_{k-1}/2$ , and the fourth inequality from the triangle inequality, the fifth inequality is by adding a nonnegative number

in the last term. Continuing,

$$\begin{aligned}
& \text{err}(h, \hat{S}_{k-1}) - \text{err}(\hat{h}_{k-1}, \hat{S}_{k-1}) \\
& \leq 9\varepsilon_{k-1}/16 + 4\sigma_{k-1} + 2\sqrt{\sigma_{k-1}(\text{err}(\hat{h}_{k-1}, \hat{S}_{k-1}) + 9\varepsilon_{k-1}/16)} \\
& \leq 9\varepsilon_{k-1}/16 + 4\sigma_{k-1} + 2\sqrt{\sigma_{k-1}\text{err}(\hat{h}_{k-1}, \hat{S}_{k-1})} + 2\sqrt{\varepsilon_{k-1}/512 \cdot 9\varepsilon_{k-1}/16} \\
& \leq 9\varepsilon_{k-1}/16 + \varepsilon_{k-1}/32 + 2\sqrt{\varepsilon_{k-1}/512 \cdot 9\varepsilon_{k-1}/16} \\
& \leq 3\varepsilon_{k-1}/4
\end{aligned}$$

Where the first inequality is by simple algebra (by letting  $D = \text{err}(h, \hat{S}_{k-1})$ ,  $E = \text{err}(\hat{h}_{k-1}, \hat{S}_{k-1}) + 9\varepsilon_{k-1}/16$ ,  $F = \sigma_{k-1}$  in  $D \leq E + F + \sqrt{DF} + \sqrt{EF} \Rightarrow D \leq E + 4F + 2\sqrt{EF}$ ), the second inequality is from  $\sqrt{A+B} \leq \sqrt{A} + \sqrt{B}$  and  $\sigma_{k-1} \leq \varepsilon_{k-1}/512$  which utilizes Equation (18) of Invariant 2, the third inequality is again by Equation (18) of Invariant 2, the fourth inequality is by algebra.  $\square$

**Lemma 5.** Suppose Invariants 1 and 2 hold at the end of epoch  $k-1$ . Then,

$$\text{err}_D(\hat{h}_{k-1}) - \text{err}_D(h^*) \leq \varepsilon_{k-1}/8$$

*Proof.* By Lemma 4, we know that since  $h^*$  has excess error 0 with respect to  $D$ ,

$$\text{err}(h^*, \hat{S}_{k-1}) - \text{err}(\hat{h}_{k-1}, \hat{S}_{k-1}) \leq 3\varepsilon_{k-1}/4 \quad (21)$$

Therefore,

$$\begin{aligned}
& \text{err}_D(\hat{h}_{k-1}) - \text{err}_D(h^*) \\
& \leq \text{err}(\hat{h}_{k-1}, S_{k-1}) - \text{err}(h^*, S_{k-1}) + \sigma_{k-1} + \sqrt{\sigma_{k-1}\rho_{S_{k-1}}(\hat{h}_{k-1}, h^*)} \\
& \leq \text{err}(\hat{h}_{k-1}, \hat{S}_{k-1}) - \text{err}(h^*, \hat{S}_{k-1}) + \sigma_{k-1} + \sqrt{\sigma_{k-1}\rho_{S_{k-1}}(\hat{h}_{k-1}, h^*)} + \varepsilon_{k-1}/16 \\
& \leq \varepsilon_{k-1}/16 + \sigma_{k-1} + \sqrt{\sigma_{k-1}(\text{err}(\hat{h}_{k-1}, \hat{S}_{k-1}) + \text{err}(h^*, \hat{S}_{k-1}))} \\
& \leq \varepsilon_{k-1}/16 + \sigma_{k-1} + \sqrt{\sigma_{k-1}(2\text{err}(\hat{h}_{k-1}, \hat{S}_{k-1}) + 3\varepsilon_{k-1}/4)} \\
& \leq \varepsilon_{k-1}/16 + \sigma_{k-1} + \sqrt{2\sigma_{k-1}\text{err}(\hat{h}_{k-1}, \hat{S}_{k-1})} + \sqrt{\varepsilon_{k-1}/512 \cdot 3\varepsilon_{k-1}/4} \\
& \leq \varepsilon_{k-1}/8
\end{aligned}$$

where the first inequality is from Equation (17) of Invariant 2, the second inequality uses Invariant 1, the third inequality follows from the optimality of  $\hat{h}_{k-1}$  and triangle inequality, the fourth inequality uses Equation (21), the fifth inequality uses the fact that  $\sqrt{A+B} \leq \sqrt{A} + \sqrt{B}$  and  $\sigma_{k-1} \leq \varepsilon_{k-1}/512$ , which is from Equation (18) of Invariant 2, the last inequality again utilizes the Equation (18) of Invariant 2.  $\square$

**Lemma 6.** Suppose Invariants 1, 2, and 3 hold in epoch  $k-1$  conditioned on event  $F_{k-1}$ . Then conditioned on event  $F_{k-1}$ , the implicit confidence set  $V_{k-1} = V(\hat{S}_{k-1}, 3\varepsilon_k/2)$  is such that:

- (1) If  $h \in \mathcal{H}$  satisfies  $\text{err}_D(h) - \text{err}_D(h^*) \leq \varepsilon_k$ , then  $h$  is in  $V_{k-1}$ .
- (2) If  $h \in \mathcal{H}$  is in  $V_{k-1}$ , then  $\text{err}_D(h) - \text{err}_D(h^*) \leq \varepsilon_{k-1}$ . Hence  $V_{k-1} \subseteq B_U(h^*, 2\varepsilon_k + \varepsilon_{k-1})$ .
- (3) Algorithm 4, **in\_disagr\_region**, when run on inputs dataset  $\hat{S}_{k-1}$ , threshold  $3\varepsilon_k/2$ , unlabeled example  $x$ , returns 1 if and only if  $x$  is in  $R_{k-1}$ .

*Proof.* (1) Let  $h$  be a classifier with  $\text{err}_D(h) - \text{err}_D(h^*) \leq \varepsilon_k = \varepsilon_{k-1}/2$ . Then, by Lemma 4, one has  $\text{err}(h, \hat{S}_{k-1}) - \text{err}(\hat{h}_{k-1}, \hat{S}_{k-1}) \leq 3\varepsilon_{k-1}/4 = 3\varepsilon_k/2$ . Hence,  $h$  is in  $V_{k-1}$ .

(2) Fix any  $h$  in  $V_{k-1}$ , by definition of  $V_{k-1}$ ,

$$\text{err}(h, \hat{S}_{k-1}) - \text{err}(\hat{h}_{k-1}, \hat{S}_{k-1}) \leq 3\varepsilon_k/2 = 3\varepsilon_{k-1}/4 \quad (22)$$

Recall that from Lemma 5,

$$\text{err}_D(\hat{h}_{k-1}) - \text{err}_D(h^*) \leq \varepsilon_{k-1}/8$$



Thus for classifier  $h$ , applying Invariant 1 by taking  $h' := \hat{h}_{k-1}$ , we get

$$\text{err}(h, S_{k-1}) - \text{err}(\hat{h}_{k-1}, S_{k-1}) \leq \text{err}(h, \hat{S}_{k-1}) - \text{err}(\hat{h}_{k-1}, \hat{S}_{k-1}) + \varepsilon_{k-1}/32 \quad (23)$$

Therefore,

$$\begin{aligned} & \text{err}_D(h) - \text{err}_D(\hat{h}_{k-1}) \\ & \leq \text{err}(h, S_{k-1}) - \text{err}(\hat{h}_{k-1}, S_{k-1}) + \sigma_{k-1} + \sqrt{\sigma_{k-1} \rho_{S_{k-1}}(h, \hat{h}_{k-1})} \\ & \leq \text{err}(h, S_{k-1}) - \text{err}(\hat{h}_{k-1}, S_{k-1}) + \sigma_{k-1} + \sqrt{\sigma_{k-1} (\text{err}(h, \hat{S}_{k-1}) + \text{err}(\hat{h}_{k-1}, \hat{S}_{k-1}))} \\ & \leq \text{err}(h, \hat{S}_{k-1}) - \text{err}(\hat{h}_{k-1}, \hat{S}_{k-1}) + \sigma_{k-1} + \sqrt{\sigma_{k-1} (\text{err}(h, \hat{S}_{k-1}) + \text{err}(\hat{h}_{k-1}, \hat{S}_{k-1}))} + \varepsilon_{k-1}/16 \\ & \leq 13\varepsilon_{k-1}/16 + \sigma_{k-1} + \sqrt{\sigma_{k-1} (2\text{err}(\hat{h}_{k-1}, \hat{S}_{k-1}) + 3\varepsilon_{k-1}/4)} \\ & \leq 13\varepsilon_{k-1}/16 + \sigma_{k-1} + \sqrt{2\sigma_{k-1} \text{err}(\hat{h}_{k-1}, \hat{S}_{k-1})} + \sqrt{\varepsilon_{k-1}/512 \cdot 3\varepsilon_{k-1}/4} \\ & \leq 7\varepsilon_{k-1}/8 \end{aligned}$$

where the first inequality is from Equation (17) of Invariant 2, the second inequality uses the fact that  $\rho_{\hat{S}_{k-1}}(h, h') = \rho_{S_{k-1}}(h, h') \leq \text{err}(h, \hat{S}_{k-1}) + \text{err}(h', \hat{S}_{k-1})$  for  $h, h' \in \mathcal{H}$ , the third inequality uses Equation (23); the fourth inequality is from Equation (22); the fifth inequality is from the fact that  $\sqrt{A+B} \leq \sqrt{A} + \sqrt{B}$  and  $\sigma_{k-1} \leq \varepsilon_{k-1}/512$ , which is from Equation (18) of Invariant 2, the last inequality again follows from Equation (18) of Invariant 2 and algebra.

In conjunction with the fact that  $\text{err}_D(\hat{h}_{k-1}) - \text{err}_D(h^*) \leq \varepsilon_{k-1}/8$ , this implies

$$\text{err}_D(h) - \text{err}_D(h^*) \leq \varepsilon_{k-1}$$

By triangle inequality,  $\rho(h, h^*) \leq 2\nu + \varepsilon_{k-1}$ , hence  $h \in B_U(h^*, 2\nu + \varepsilon_{k-1})$ . In summary  $V_{k-1} \subseteq B_U(h^*, 2\nu + \varepsilon_{k-1})$ .

(3) Follows directly from Lemma 3 and the fact that  $R_{k-1} = \text{DIS}(V_{k-1})$ .  $\square$

## B.2 Training the Difference Classifier

Recall that  $\Delta(r) = \text{DIS}(B_U(h^*, r))$  is the disagreement region of the disagreement ball centered around  $h^*$  with radius  $r$ .

**Lemma 7** (Difference Classifier Invariant). *There is a numerical constant  $c_1 > 0$  such that the following holds. Suppose that Invariants 1 and 2 hold at the end of epoch  $k-1$  conditioned on event  $F_{k-1}$  and that Algorithm 2 has inputs unlabeled data distribution  $U$ , oracle  $O$ ,  $\varepsilon = \varepsilon_k/128$ , hypothesis class  $\mathcal{H}^{df}$ ,  $\delta = \delta_k/2$ , previous labeled dataset  $\hat{S}_{k-1}$ . Then conditioned on event  $F_k$ ,*

(1)  $\hat{h}_k^{df}$ , the output of Algorithm 2, maintains Invariant 3.

(2)(Label Complexity: Part 1.) The number of label queries made to  $O$  is at most

$$m_{k,1} \leq c_1 \left( \frac{\mathbb{P}_U(x \in \Delta(2\nu + \varepsilon_{k-1}))}{\varepsilon_k} (d' \ln \frac{1}{\varepsilon_k} + \ln \frac{1}{\delta_k}) \right)$$

*Proof.* (1) Recall that  $F_k = F_{k-1} \cap E_k^1 \cap E_k^2$ , where  $E_k^1, E_k^2$  are defined in Subsection A.4. Suppose event  $F_k$  happens.

**Proof of Equation (19).** Recall that  $\hat{h}_k^{df}$  is the optimal solution of optimization problem (2). We have by feasibility and the fact that on event  $E_k^3$ ,  $2\hat{p}_k \geq \mathbb{P}_{\mathcal{D}}(x \in R_{k-1})$ ,

$$\mathbb{P}_{\mathcal{A}'_k}(\hat{h}_k^{df}(x) = -1, y_O \neq y_W) \leq \frac{\varepsilon_k}{256\hat{p}_k} \leq \frac{\varepsilon_k}{128\mathbb{P}_{\mathcal{D}}(x \in R_{k-1})}$$

By definition of event  $E_k^2$ , this implies

$$\begin{aligned} & \mathbb{P}_{\mathcal{A}'_k}(\hat{h}_k^{df}(x) = -1, y_O \neq y_W) \\ & \leq \mathbb{P}_{\mathcal{A}'_k}(\hat{h}_k^{df}(x) = -1, y_O \neq y_W) + \sqrt{\mathbb{P}_{\mathcal{A}'_k}(\hat{h}_k^{df}(x) = -1, y_O \neq y_W) \frac{\varepsilon_k}{1024\mathbb{P}_{\mathcal{D}}(x \in R_{k-1})}} + \frac{\varepsilon_k}{1024\mathbb{P}_{\mathcal{D}}(x \in R_{k-1})} \\ & \leq \frac{\varepsilon_k}{64\mathbb{P}_{\mathcal{D}}(x \in R_{k-1})} \end{aligned}$$

Indicating

$$\mathbb{P}_{\mathcal{D}}(\hat{h}_k^{df}(x) = -1, y_O \neq y_W, x \in R_{k-1}) \leq \frac{\varepsilon_k}{64}$$

**Proof of Equation (20).** By definition of  $h_k^{df}$  in Subsection A.4,  $h_k^{df}$  is such that:

$$\mathbb{P}_{\mathcal{D}}(h_k^{df}(x) = +1, x \in \Delta(2\nu + \varepsilon_{k-1})) \leq \alpha(2\nu + \varepsilon_{k-1}, \varepsilon_k/512)$$

$$\mathbb{P}_{\mathcal{D}}(h_k^{df}(x) = -1, y_O \neq y_W, x \in \Delta(2\nu + \varepsilon_{k-1})) \leq \varepsilon_k/512$$

By item (2) of Lemma 6, we have  $R_{k-1} \subseteq \text{DIS}(\mathbf{B}_U(h^*, 2\nu + \varepsilon_{k-1}))$ , thus

$$\mathbb{P}_{\mathcal{D}}(h_k^{df}(x) = +1, x \in R_{k-1}) \leq \alpha(2\nu + \varepsilon_{k-1}, \varepsilon_k/512) \quad (24)$$

$$\mathbb{P}_{\mathcal{D}}(h_k^{df}(x) = -1, y_O \neq y_W, x \in R_{k-1}) \leq \varepsilon_k/512 \quad (25)$$

Equation (25) implies that

$$\mathbb{P}_{\mathcal{A}_k}(h_k^{df}(x) = -1, y_O \neq y_W) \leq \frac{\varepsilon_k}{512\mathbb{P}_{\mathcal{D}}(x \in R_{k-1})} \quad (26)$$

Recall that  $\mathcal{A}'_k$  is the dataset subsampled from  $\mathcal{A}_k$  in line 3 of Algorithm 2. By definition of event  $E_k^1$ , we have that for  $h_k^{df}$ ,

$$\begin{aligned} & \mathbb{P}_{\mathcal{A}'_k}(h_k^{df}(x) = -1, y_O \neq y_W) \\ & \leq \mathbb{P}_{\mathcal{A}_k}(h_k^{df}(x) = -1, y_O \neq y_W) + \sqrt{\mathbb{P}_{\mathcal{A}_k}(h_k^{df}(x) = -1, y_O \neq y_W) \frac{\varepsilon_k}{1024\mathbb{P}_{\mathcal{D}}(x \in R_{k-1})}} + \frac{\varepsilon_k}{1024\mathbb{P}_{\mathcal{D}}(x \in R_{k-1})} \\ & \leq \frac{\varepsilon_k}{256\mathbb{P}_{\mathcal{D}}(x \in R_{k-1})} \leq \frac{\varepsilon_k}{256\hat{p}_k} \end{aligned}$$

where the second inequality is from Equation (26), and the last inequality is from the fact that  $\hat{p}_k \leq \mathbb{P}_{\mathcal{D}}(x \in R_{k-1})$ . Hence,  $h_k^{df}$  is a feasible solution to the optimization problem (2). Thus,

$$\begin{aligned} & \mathbb{P}_{\mathcal{A}_k}(\hat{h}_k^{df}(x) = +1) \\ & \leq \mathbb{P}_{\mathcal{A}'_k}(\hat{h}_k^{df}(x) = +1) + \sqrt{\mathbb{P}_{\mathcal{A}'_k}(\hat{h}_k^{df}(x) = +1) \frac{\varepsilon_k}{1024\mathbb{P}_{\mathcal{D}}(x \in R_{k-1})}} + \frac{\varepsilon_k}{1024\mathbb{P}_{\mathcal{D}}(x \in R_{k-1})} \\ & \leq 2(\mathbb{P}_{\mathcal{A}'_k}(\hat{h}_k^{df}(x) = +1) + \frac{\varepsilon_k}{1024\mathbb{P}_{\mathcal{D}}(x \in R_{k-1})}) \\ & \leq 2(\mathbb{P}_{\mathcal{A}'_k}(h_k^{df}(x) = +1) + \frac{\varepsilon_k}{1024\mathbb{P}_{\mathcal{D}}(x \in R_{k-1})}) \\ & \leq 2((\mathbb{P}_{\mathcal{A}_k}(h_k^{df}(x) = +1) + \sqrt{\mathbb{P}_{\mathcal{A}_k}(h_k^{df}(x) = +1) \frac{\varepsilon_k}{1024\mathbb{P}_{\mathcal{D}}(x \in R_{k-1})}} + \frac{\varepsilon_k}{1024\mathbb{P}_{\mathcal{D}}(x \in R_{k-1})}) + \frac{\varepsilon_k}{1024\mathbb{P}_{\mathcal{D}}(x \in R_{k-1})}) \\ & \leq 6(\mathbb{P}_{\mathcal{A}_k}(h_k^{df}(x) = +1) + \frac{\varepsilon_k}{1024\mathbb{P}_{\mathcal{D}}(x \in R_{k-1})}) \end{aligned}$$

where the first inequality is by definition of event  $E_k^1$ , the second inequality is by algebra, the third inequality is by optimality of  $\hat{h}_k^{df}$  in (2),  $\mathbb{P}_{\mathcal{A}'_k}(\hat{h}_k^{df}(x) = +1) \leq \mathbb{P}_{\mathcal{A}'_k}(h_k^{df}(x) = +1)$ , the fourth inequality is by definition of event  $E_k^1$ , the fifth inequality is by algebra.

Therefore,

$$\mathbb{P}_{\mathcal{D}}(\hat{h}_k^{df}(x) = +1, x \in R_{k-1}) \leq 6(\mathbb{P}_{\mathcal{D}}(h_k^{df}(x) = +1, x \in R_{k-1}) + \varepsilon_k/1024) \leq 6(\alpha(2\nu + \varepsilon_{k-1}, \varepsilon_k/512) + \varepsilon_k/1024) \quad (27)$$

where the second inequality follows from Equation (24). This establishes the correctness of Invariant 3.

(2) The number of label requests to  $\mathcal{O}$  follows from line 3 of Algorithm 2 (see Equation (16)). That is, we can choose  $c_1$  large enough (independently of  $k$ ), such that

$$m_{k,1} \leq c_1 \left( \frac{\mathbb{P}_{\mathcal{D}}(x \in R_{k-1})}{\varepsilon_k} (d' \ln \frac{1}{\varepsilon_k} + \ln \frac{1}{\delta_k}) \right) \leq c_1 \left( \frac{\mathbb{P}_U(x \in \Delta(2\nu + \varepsilon_{k-1}))}{\varepsilon_k} (d' \ln \frac{1}{\varepsilon_k} + \ln \frac{1}{\delta_k}) \right)$$

where in the second step we use the fact that on event  $F_k$ , by item (2) of Lemma 6,  $R_{k-1} \subseteq \text{DIS}(\mathbf{B}_U(h^*, 2\nu + \varepsilon_{k-1}))$ , thus  $\mathbb{P}_{\mathcal{D}}(x \in R_{k-1}) \leq \mathbb{P}_{\mathcal{D}}(x \in \Delta(2\nu + \varepsilon_{k-1})) = \mathbb{P}_U(x \in \Delta(2\nu + \varepsilon_{k-1}))$ .  $\square$

### B.3 Adaptive Subsampling

---

**Algorithm 5** Adaptive Active Learning using Difference Classifier

---

```

1: Input: Unlabeled data distribution  $U$ , oracles  $W$  and  $O$ , difference classifier  $h^{df}$ , target excess
   error  $\varepsilon$ , confidence  $\delta$ , previous labeled dataset  $\hat{T}$ .
2: Output: Parameter  $\sigma$ , labeled dataset  $\hat{S}$ .
3: Let  $\hat{h} = \text{CONS-LEARN}_{\mathcal{H}}(\emptyset, \hat{T})$ .
4: for  $t = 1, 2, \dots$ , do
5:   Let  $\delta^t = \delta/t(t+1)$ . Define:  $\sigma(2^t, \delta^t) = \frac{8}{2^t} (2d \ln \frac{2e2^t}{d} + \ln \frac{24}{\delta^t})$ .
6:   Draw  $2^t$  examples from  $U$  to form  $S^{t,U}$ .
7:   for each  $x \in S^{t,U}$  do:
8:     if in_disagr_region( $\hat{T}, \frac{3\varepsilon}{2}, x$ ) = 0 then #  $x$  is inside the agreement region
9:       Add  $(x, \hat{h}(x))$  to  $\hat{S}^t$ .
10:    else #  $x$  is inside the disagreement region
11:      If  $h^{df}(x) = +1$ , query  $O$  for the label  $y$  of  $x$ , otherwise query  $W$ . Add  $(x, y)$  to  $\hat{S}^t$ .
12:    end if
13:  end for
14:  Train  $\hat{h}^t \leftarrow \text{CONS-LEARN}_{\mathcal{H}}(\emptyset, \hat{S}^t)$ .
15:  if  $\sigma(2^t, \delta^t) + \sqrt{\sigma(2^t, \delta^t) \text{err}(\hat{h}^t, \hat{S}^t)} \leq \varepsilon/512$  then
16:     $t_0 \leftarrow t$ , break
17:  end if
18: end for
19: return  $\sigma \leftarrow \sigma(2^{t_0}, \delta^{t_0})$ ,  $\hat{S} \leftarrow \hat{S}^{t_0}$ .

```

---

**Lemma 8.** *There is a numerical constant  $c_2 > 0$  such that the following holds. Suppose Invariants 1, 2, and 3 hold in epoch  $k-1$  on event  $F_{k-1}$ ; Algorithm 5 receives inputs unlabeled distribution  $U$ , classifier  $\hat{h}_{k-1}$ , difference classifier  $\hat{h}^{df} = \hat{h}_{k-1}^{df}$ , target excess error  $\varepsilon = \varepsilon_k$ , confidence  $\delta = \delta_k/2$ , previous labeled dataset  $\hat{S}_{k-1}$ . Then on event  $F_k$ ,*

(1)  $\hat{S}_k$ , the output of Algorithm 5, maintains Invariants 1 and 2.

(2) (Label Complexity: Part 2.) The number of label queries to  $O$  in Algorithm 5 is at most:

$$m_{k,2} \leq c_2 \left( \frac{(\nu + \varepsilon_k)(\alpha(2\nu + \varepsilon_{k-1}, \varepsilon_k/512) + \varepsilon_k)}{\varepsilon_k^2} \cdot d \left( \ln^2 \frac{1}{\varepsilon_k} + \ln^2 \frac{1}{\delta_k} \right) \right)$$

*Proof.* (1) Recall that  $F_k = F_{k-1} \cap E_k^1 \cap E_k^2$ , where  $E_k^1, E_k^2$  are defined in Subsection A.4. Suppose event  $F_k$  happens.

**Proof of Invariant 1.** We consider a pair of classifiers  $h, h' \in \mathcal{H}$ , where  $h$  is an arbitrary classifier in  $\mathcal{H}$  and  $h'$  has excess error at most  $\varepsilon_k$ .

At iteration  $t = t_0(k)$  of Algorithm 5, the breaking criterion in line 14 is met, i.e.

$$\sigma(2^{t_0(k)}, \delta_k^{t_0(k)}) + \sqrt{\sigma(2^{t_0(k)}, \delta_k^{t_0(k)}) \text{err}(\hat{h}^{t_0(k)}, \hat{S}_k^{t_0(k)})} \leq \varepsilon_k/512 \quad (28)$$

First we expand the definition of  $\text{err}(h, S_k)$  and  $\text{err}(h, \hat{S}_k)$  respectively:

$$\text{err}(h, S_k) = \mathbb{P}_{\mathcal{S}_k}(\hat{h}_k^{df}(x) = +1, h(x) \neq y_O, x \in R_{k-1}) + \mathbb{P}_{\mathcal{S}_k}(\hat{h}_k^{df}(x) = -1, h(x) \neq y_O, x \in R_{k-1}) + \mathbb{P}_{\mathcal{S}_k}(h(x) \neq y_O, x \notin R_{k-1})$$

$$\text{err}(h, \hat{S}_k) = \mathbb{P}_{\mathcal{S}_k}(\hat{h}_k^{df}(x) = +1, h(x) \neq y_O, x \in R_{k-1}) + \mathbb{P}_{\mathcal{S}_k}(\hat{h}_k^{df}(x) = -1, h(x) \neq y_W, x \in R_{k-1}) + \mathbb{P}_{\mathcal{S}_k}(h(x) \neq h^*(x), x \notin R_{k-1})$$

where we use the fact that by Lemma 6, for all examples  $x \notin R_{k-1}$ ,  $\hat{h}_{k-1}(x) = h^*(x)$ .

We next show that  $\mathbb{P}_{\mathcal{S}_k}(\hat{h}_k^{df}(x) = -1, h(x) \neq y_O, x \in R_{k-1})$  is close to  $\mathbb{P}_{\mathcal{S}_k}(\hat{h}_k^{df}(x) = -1, h(x) \neq y_W, x \in R_{k-1})$ .

From Lemma 7, we know that conditioned on event  $F_k$ ,

$$\mathbb{P}_{\mathcal{D}}(\hat{h}_k^{df}(x) = -1, y_O \neq y_W, x \in R_{k-1}) \leq \varepsilon_k/64$$

In the meantime, from Equation (28),  $\gamma(2^{t_0(k)}, \delta_k^{t_0(k)}) \leq \sigma(2^{t_0(k)}, \delta_k^{t_0(k)}) \leq \varepsilon_k/512$ . Recall that  $\mathcal{S}_k = \mathcal{S}_k^{t_0(k)}$ . Therefore, by definition of  $E_k^2$ ,

$$\begin{aligned} & \mathbb{P}_{\mathcal{S}_k}(\hat{h}_k^{df}(x) = -1, y_O \neq y_W, x \in R_{k-1}) \\ & \leq \mathbb{P}_{\mathcal{D}}(\hat{h}_k^{df}(x) = -1, y_O \neq y_W, x \in R_{k-1}) + \sqrt{\mathbb{P}_{\mathcal{D}}(\hat{h}_k^{df}(x) = -1, y_O \neq y_W, x \in R_{k-1})\gamma(2^{t_0(k)}, \delta_k^{t_0(k)}) + \gamma(2^{t_0(k)}, \delta_k^{t_0(k)})} \\ & \leq \mathbb{P}_{\mathcal{D}}(\hat{h}_k^{df}(x) = -1, y_O \neq y_W, x \in R_{k-1}) + \sqrt{\mathbb{P}_{\mathcal{D}}(\hat{h}_k^{df}(x) = -1, y_O \neq y_W, x \in R_{k-1})\varepsilon_k/512 + \varepsilon_k/512} \\ & \leq \varepsilon_k/32 \end{aligned}$$

By triangle inequality, for all classifier  $h_0 \in \mathcal{H}$ ,

$$|\mathbb{P}_{\mathcal{S}_k}(\hat{h}_k^{df}(x) = -1, h_0(x) \neq y_O, x \in R_{k-1}) - \mathbb{P}_{\mathcal{S}_k}(\hat{h}_k^{df}(x) = -1, h_0(x) \neq y_W, x \in R_{k-1})| \leq \varepsilon_k/32 \quad (29)$$

Specifically for  $h$  and  $h'$ , Equation (29) hold:

$$\begin{aligned} & |\mathbb{P}_{\mathcal{S}_k}(\hat{h}_k^{df}(x) = -1, h(x) \neq y_O, x \in R_{k-1}) - \mathbb{P}_{\mathcal{S}_k}(\hat{h}_k^{df}(x) = -1, h(x) \neq y_W, x \in R_{k-1})| \leq \varepsilon_k/32 \\ & |\mathbb{P}_{\mathcal{S}_k}(\hat{h}_k^{df}(x) = -1, h'(x) \neq y_O, x \in R_{k-1}) - \mathbb{P}_{\mathcal{S}_k}(\hat{h}_k^{df}(x) = -1, h'(x) \neq y_W, x \in R_{k-1})| \leq \varepsilon_k/32 \end{aligned}$$

Combining, we get:

$$\begin{aligned} & (\mathbb{P}_{\mathcal{S}_k}(\hat{h}_k^{df}(x) = -1, h(x) \neq y_W, x \in R_{k-1}) - \mathbb{P}_{\mathcal{S}_k}(\hat{h}_k^{df}(x) = -1, h'(x) \neq y_W, x \in R_{k-1})) \quad (30) \\ & - (\mathbb{P}_{\mathcal{S}_k}(\hat{h}_k^{df}(x) = -1, h(x) \neq y_O, x \in R_{k-1}) - \mathbb{P}_{\mathcal{S}_k}(\hat{h}_k^{df}(x) = -1, h'(x) \neq y_O, x \in R_{k-1})) \leq \varepsilon_k/16 \end{aligned}$$

We now show the labels inferred in the region  $\mathcal{X} \setminus R_{k-1}$  is “favorable” to the classifiers whose excess error is at most  $\varepsilon_k/2$ .

By triangle inequality,

$$\mathbb{P}_{\mathcal{S}_k}(h(x) \neq y_O, x \notin R_{k-1}) - \mathbb{P}_{\mathcal{S}_k}(h^*(x) \neq y_O, x \notin R_{k-1}) \leq \mathbb{P}_{\mathcal{S}_k}(h(x) \neq h^*(x), x \notin R_{k-1})$$

By Lemma 6, since  $h'$  has excess error at most  $\varepsilon_k$ ,  $h'$  agrees with  $h^*$  on all  $x$  inside  $\mathcal{X} \setminus R_{k-1}$  on event  $F_{k-1}$ , hence  $\mathbb{P}_{\mathcal{S}_k}(h'(x) \neq h^*(x), x \notin R_{k-1}) = 0$ . This gives

$$\begin{aligned} & \mathbb{P}_{\mathcal{S}_k}(h(x) \neq y_O, x \notin R_{k-1}) - \mathbb{P}_{\mathcal{S}_k}(h'(x) \neq y_O, x \notin R_{k-1}) \\ & \leq \mathbb{P}_{\mathcal{S}_k}(h(x) \neq h^*(x), x \notin R_{k-1}) - \mathbb{P}_{\mathcal{S}_k}(h'(x) \neq h^*(x), x \notin R_{k-1}) \end{aligned} \quad (31)$$

Combining Equations (30) and (31), we conclude that

$$\text{err}(h, S_k) - \text{err}(h', S_k) \leq \text{err}(h, \hat{S}_k) - \text{err}(h', \hat{S}_k) + \varepsilon_k/16$$

This establishes the correctness of Invariant 1.

**Proof of Invariant 2.** Recall by definition of  $E_k^2$  the following concentration results hold for all  $t \in \mathbb{N}$ :

$$|(\text{err}(h, S_k^t) - \text{err}(h', S_k^t)) - (\text{err}_D(h) - \text{err}_D(h'))| \leq \sigma(2^t, \delta_k^t) + \sqrt{\sigma(2^t, \delta_k^t)\rho_{S_k^t}(h, h')}$$

In particular, for iteration  $t_0(k)$  we have

$$|(\text{err}(h, S_k^{t_0(k)}) - \text{err}(h', S_k^{t_0(k)})) - (\text{err}_D(h) - \text{err}_D(h'))| \leq \sigma(2^{t_0(k)}, \delta_k^{t_0(k)}) + \sqrt{\sigma(2^{t_0(k)}, \delta_k^{t_0(k)})\rho_{S_k^{t_0(k)}}(h, h')}$$

Recall that  $\hat{S}_k = \hat{S}_k^{t_0(k)}$ ,  $\hat{h}_k = \hat{h}_k^{t_0(k)}$ , and  $\sigma_k = \sigma(2^{t_0(k)}, \delta_k^{t_0(k)})$ , hence the above is equivalent to

$$|(\text{err}(h, S_k) - \text{err}(h', S_k)) - (\text{err}_D(h) - \text{err}_D(h'))| \leq \sigma_k + \sqrt{\sigma_k \rho_{S_k}(h, h')} \quad (32)$$

Equation (32) establishes the correctness of Equation (17) of Invariant 2. Equation (18) of Invariant 2 follows from Equation (28).

(2) We define  $\tilde{h}_k = \operatorname{argmin}_{h \in \mathcal{H}} \operatorname{err}_{\tilde{D}_k}(h)$ , and define  $\tilde{v}_k$  to be  $\operatorname{err}_{\tilde{D}_k}(\tilde{h}_k)$ . To prove the bound on the number of label requests, we first claim that if  $t$  is sufficiently large that

$$\sigma(2^t, \delta_k^t) + \sqrt{\sigma(2^t, \delta_k^t) \tilde{v}_k} \leq \varepsilon_k / 1536 \quad (33)$$

then the algorithm will satisfy the breaking criterion at line 14 of Algorithm 5, that is, for this value of  $t$ ,

$$\sigma(2^t, \delta_k^t) + \sqrt{\sigma(2^t, \delta_k^t) \operatorname{err}(\hat{h}_k^t, \hat{S}_k^t)} \leq \varepsilon_k / 512 \quad (34)$$

Indeed, by definition of  $E_k^2$ , if event  $F_k$  happens,

$$\begin{aligned} & \operatorname{err}(\tilde{h}_k, \hat{S}_k^t) \\ & \leq \operatorname{err}_{\tilde{D}_k}(\tilde{h}_k) + \sigma(2^t, \delta_k^t) + \sqrt{\sigma(2^t, \delta_k^t) \operatorname{err}_{\tilde{D}_k}(\tilde{h}_k)} \\ & = \tilde{v}_k + \sigma(2^t, \delta_k^t) + \sqrt{\sigma(2^t, \delta_k^t) \tilde{v}_k} \end{aligned} \quad (35)$$

Therefore,

$$\begin{aligned} & \sigma(2^t, \delta_k^t) + \sqrt{\sigma(2^t, \delta_k^t) \operatorname{err}(\hat{h}_k^t, \hat{S}_k^t)} \\ & \leq \sigma(2^t, \delta_k^t) + \sqrt{\sigma(2^t, \delta_k^t) \operatorname{err}(\tilde{h}_k, \hat{S}_k^t)} \\ & \leq \sigma(2^t, \delta_k^t) + \sqrt{\sigma(2^t, \delta_k^t) (2\tilde{v}_k + 2\sigma(2^t, \delta_k^t))} \\ & \leq 3\sigma(2^t, \delta_k^t) + 2\sqrt{\sigma(2^t, \delta_k^t) \tilde{v}_k} \\ & \leq \varepsilon_k / 512 \end{aligned}$$

where the first inequality is from the optimality of  $\hat{h}_k^t$ , the second inequality is from Equation (35), the third inequality is by algebra, the last inequality follows from Equation (33). The claim follows. Next, we solve for the minimum  $t$  that satisfies (33), which is an upper bound of  $t_0(k)$ . Fact 1 implies that there is a numerical constant  $c_3 > 0$  such that

$$2^{t_0(k)} \leq c_3 \frac{\tilde{v}_k + \varepsilon_k}{\varepsilon_k^2} \left( d \ln \frac{1}{\varepsilon_k} + \ln \frac{1}{\delta_k} \right)$$

Thus, there is a numerical constant  $c_4 > 0$  such that

$$t_0(k) \leq c_4 \left( \ln d + \ln \frac{1}{\varepsilon_k} + \ln \ln \frac{1}{\delta_k} \right)$$

Hence, there is a numerical constant  $c_5 > 0$  (that does not depend on  $k$ ) such that the following holds. If event  $F_k$  happens, then the number of label queries made by Algorithm 5 to  $\mathcal{O}$  can be bounded as follows:

$$\begin{aligned} m_{k,2} &= \sum_{t=1}^{t_0(k)} |S_k^{t,U} \cap \{x : \hat{h}_k^{df}(x) = +1\} \cap R_{k-1}| \\ &= \sum_{t=1}^{t_0(k)} 2^t \mathbb{P}_{\mathcal{S}_k^t}(\hat{h}_k^{df}(x) = +1, x \in R_{k-1}) \\ &\leq \sum_{t=1}^{t_0(k)} 2^t (2\mathbb{P}_{\mathcal{D}}(\hat{h}_k^{df}(x) = +1, x \in R_{k-1}) + 2 \cdot 4 \frac{\ln \frac{2}{\delta_k}}{2^t}) \\ &\leq 4 \cdot 2^{t_0(k)} \mathbb{P}_{\mathcal{D}}(\hat{h}_k^{df}(x) = +1, x \in R_{k-1}) + 8 \cdot t_0(k) \ln \frac{2}{\delta_k^{t_0(k)}} \\ &\leq c_5 \left( \left( \frac{(\tilde{v}_k + \varepsilon_k) \mathbb{P}_{\mathcal{D}}(\hat{h}_k^{df}(x) = +1, x \in R_{k-1})}{\varepsilon_k^2} + 1 \right) \cdot d \left( \ln^2 \frac{1}{\varepsilon_k} + \ln^2 \frac{1}{\delta_k} \right) \right) \\ &\leq c_5 \left( \left( \frac{(\tilde{v}_k + \varepsilon_k) \cdot 6(\alpha(2v + \varepsilon_{k-1}, \varepsilon_k/512) + \varepsilon_k/1024)}{\varepsilon_k^2} + 1 \right) \cdot d \left( \ln^2 \frac{1}{\varepsilon_k} + \ln^2 \frac{1}{\delta_k} \right) \right) \end{aligned}$$

where the second equality is from the fact that  $|S_k^{t,U} \cap \{x : \hat{h}_k^{df}(x) = -1\} \cap R_{k-1}| = |S_k^{t,U}| \cdot \mathbb{P}_{\mathcal{S}_k^t}(\hat{h}_k^{df}(x) = -1, x \in R_{k-1})$ , in conjunction with  $|S_k^{t,U}| = 2^t$ ; the first inequality is by definition of  $E_k^2$ , the second and third inequality is from algebra that  $t_0(k) \ln \frac{1}{\delta_k^{t_0(k)}} \leq c_5 d (\ln^2 \frac{1}{\varepsilon_k} + \ln^2 \frac{1}{\delta_k})$  for some constant  $c_5 > 0$ , along with the choice of  $c_2$ , the fourth step is from Lemma 7 which states that Invariant 3 holds at epoch  $k$ .

What remains to be argued is an upper bound on  $\tilde{v}_k$ . Note that

$$\begin{aligned}
& \tilde{v}_k \\
&= \min_{h \in \mathcal{H}} [\mathbb{P}_{\mathcal{D}}(\hat{h}_k^{df}(x) = -1, h(x) \neq y_W, x \in R_{k-1}) + \mathbb{P}_{\mathcal{D}}(\hat{h}_k^{df}(x) = +1, h(x) \neq y_O, x \in R_{k-1}) + \mathbb{P}_{\mathcal{D}}(h(x) \neq h^*(x), x \notin R_{k-1})] \\
&\leq \mathbb{P}_{\mathcal{D}}(\hat{h}_k^{df}(x) = -1, h^*(x) \neq y_W, x \in R_{k-1}) + \mathbb{P}_{\mathcal{D}}(\hat{h}_k^{df}(x) = +1, h^*(x) \neq y_O, x \in R_{k-1}) \\
&\leq \mathbb{P}_{\mathcal{D}}(\hat{h}_k^{df}(x) = -1, h^*(x) \neq y_O, x \in R_{k-1}) + \mathbb{P}_{\mathcal{D}}(\hat{h}_k^{df}(x) = +1, h^*(x) \neq y_O, x \in R_{k-1}) + \varepsilon_k/64 \\
&\leq \mathbb{P}_{\mathcal{D}}(\hat{h}_k^{df}(x) = -1, h^*(x) \neq y_O, x \in R_{k-1}) + \mathbb{P}_{\mathcal{D}}(\hat{h}_k^{df}(x) = +1, h^*(x) \neq y_O, x \in R_{k-1}) + \mathbb{P}_{\mathcal{D}}(h(x) \neq y_O, x \notin R_{k-1}) + \varepsilon_k/64 \\
&= v + \varepsilon_k/64
\end{aligned}$$

where the first step is by definition of  $\text{err}_{\hat{D}_k}(h)$ , the second step is by the suboptimality of  $h^*$ , the third step is by Equation (29), the fourth step is by adding a positive term  $\mathbb{P}_{\mathcal{D}}(h(x) \neq y_O, x \notin R_{k-1})$ , the fifth step is by definition of  $\text{err}_D(h)$ . Therefore, we conclude that there is a numerical constant  $c_2 > 0$ , such that  $m_{k,2}$ , the number of label requests to  $O$  in Algorithm 5 is at most

$$c_2 \left( \frac{(v + \varepsilon_k)(\alpha(2v + \varepsilon_{k-1}, \varepsilon_k/512) + \varepsilon_k)}{\varepsilon_k^2} \cdot d(\ln^2 \frac{1}{\varepsilon_k} + \ln^2 \frac{1}{\delta_k}) \right)$$

□

#### B.4 Putting It Together – Consistency and Label Complexity

*Proof of Lemma 2.* With foresight, pick  $c_0 > 0$  to be a large enough constant. We prove the result by induction.

**Base case.** Consider  $k = 0$ . Recall that  $F_0$  is defined as

$$F_0 = \left\{ \text{for all } h, h' \in \mathcal{H}, |(\text{err}(h, S_0) - \text{err}(h', S_0)) - (\text{err}_D(h) - \text{err}_D(h'))| \leq \sigma(n_0, \delta_0) + \sqrt{\sigma(n_0, \delta_0) \rho_{S_0}(h, h')} \right\}$$

Note that by definition in Subsection A.3,  $\hat{S}_0 = S_0$ . Therefore Invariant 1 trivially holds. When  $F_0$  happens, Equation (17) of Invariant 2 holds, and  $n_0$  is such that  $\sqrt{\sigma_0} \leq \varepsilon_0/1024$ , thus,

$$\sigma_0 + \sqrt{\sigma_0 \text{err}(\hat{h}_0, \hat{S}_0)} \leq \varepsilon_0/512$$

which establishes the validity of Equation (18) of Invariant 2.

Meanwhile, the number of label requests to  $O$  is

$$n_0 = 64 \cdot 1024^2 (d \ln(512 \cdot 1024^2) + \ln \frac{96}{\delta}) \leq c_0 (d + \ln \frac{1}{\delta})$$

**Inductive case.** Suppose the claim holds for  $k' < k$ . The inductive hypothesis states that Invariants 1,2,3 hold in epoch  $k-1$  on event  $F_{k-1}$ . By Lemma 7 and Lemma 8, Invariants 1,2,3 holds in epoch  $k$  on event  $F_k$ . Suppose  $F_k$  happens. By Lemma 7, there is a numerical constant  $c_1 > 0$  such that the number of label queries in Algorithm 2 in line 12 is at most

$$m_{k,1} \leq c_1 \left( \frac{\mathbb{P}_U(x \in \Delta(2v + \varepsilon_{k-1}))}{\varepsilon_k} (d' \ln \frac{1}{\varepsilon_k} + \ln \frac{1}{\delta_k}) \right)$$

Meanwhile, by Lemma 8, there is a numerical constant  $c_2 > 0$  such that the number of label queries in Algorithm 5 in line 14 is at most

$$m_{k,2} \leq c_2 \left( \frac{(\alpha(2v + \varepsilon_{k-1}, \varepsilon_k/512) + \varepsilon_k)(v + \varepsilon_k)}{\varepsilon_k^2} \cdot d(\ln^2 \frac{1}{\varepsilon_k} + \ln^2 \frac{1}{\delta_k}) \right)$$

Thus, the number of label requests in total at epoch  $k$  is at most

$$\begin{aligned} m_k &= m_{k,1} + m_{k,2} \\ &\leq c_0 \left( \frac{(\alpha(2v + \varepsilon_{k-1}, \varepsilon_k/512) + \varepsilon_k)(v + \varepsilon_k)}{\varepsilon_k^2} d \left( \ln^2 \frac{1}{\varepsilon_k} + \ln^2 \frac{1}{\delta_k} \right) + \frac{\mathbb{P}_U(x \in \Delta(2v + \varepsilon_{k-1}))}{\varepsilon_k} \left( d' \ln \frac{1}{\varepsilon_k} + \ln \frac{1}{\delta_k} \right) \right) \end{aligned}$$

This completes the induction.  $\square$

**Theorem 3** (Consistency). *If  $F_{k_0}$  happens, then the classifier  $\hat{h}$  returned by Algorithm 1 is such that*

$$\text{err}_D(\hat{h}) - \text{err}_D(h^*) \leq \varepsilon$$

*Proof.* By Lemma 2, Invariants 1, 2, 3 hold at epoch  $k_0$ . Thus by Lemma 5,

$$\text{err}_D(\hat{h}) - \text{err}_D(h^*) = \text{err}_D(\hat{h}_{k_0}) - \text{err}_D(h^*) \leq \varepsilon_{k_0}/8 \leq \varepsilon$$

$\square$

*Proof of Theorem 1.* This is an immediate consequence of Theorem 3.  $\square$

**Theorem 4** (Label Complexity). *If  $F_{k_0}$  happens, then the number of label queries made by Algorithm 1 to  $O$  is at most*

$$\tilde{O} \left( \left( \sup_{r \geq \varepsilon} \frac{\alpha(2v + r, r/1024)}{2v + r} \right) d \left( \frac{v^2}{\varepsilon^2} + 1 \right) + \left( \sup_{r \geq \varepsilon} \frac{\mathbb{P}_U(x \in \Delta(2v + r))}{2v + r} \right) d' \left( \frac{v}{\varepsilon} + 1 \right) \right)$$

*Proof.* Conditioned on event  $F_{k_0}$ , we bound the sum  $\sum_{k=0}^{k_0} m_k$ .

$$\begin{aligned} &\sum_{k=0}^{k_0} m_k \\ &\leq c_0 \left( d + \ln \frac{1}{\delta} \right) + c_0 \left( \sum_{k=1}^{k_0} \frac{(\alpha(2v + \varepsilon_{k-1}, \varepsilon_k/512) + \varepsilon_k)(v + \varepsilon_k)}{\varepsilon_k^2} d \left( \ln^2 \frac{1}{\varepsilon_k} + \ln^2 \frac{1}{\delta_k} \right) + \frac{\mathbb{P}_U(x \in \Delta(2v + \varepsilon_{k-1}))}{\varepsilon_k} \left( d' \ln \frac{1}{\varepsilon_k} + \ln \frac{1}{\delta_k} \right) \right) \\ &\leq c_0 \left( d + \ln \frac{1}{\delta} \right) + c_0 \left( \sum_{k=1}^{k_0} \frac{(\alpha(2v + \varepsilon_{k-1}, \varepsilon_k/512) + \varepsilon_k)(v + \varepsilon_k)}{\varepsilon_k^2} d \left( 3 \ln^2 \frac{1}{\varepsilon} + 2 \ln^2 \frac{1}{\delta} \right) + \frac{\mathbb{P}_U(x \in \Delta(2v + \varepsilon_{k-1}))}{\varepsilon_k} \left( 2d' \ln \frac{1}{\varepsilon} + \ln \frac{1}{\delta} \right) \right) \\ &\leq \left( \sup_{r \geq \varepsilon} \frac{\alpha(2v + r, r/1024) + r}{2v + r} \right) d \left( 3 \ln^2 \frac{1}{\varepsilon} + 2 \ln^2 \frac{1}{\delta} \right) \sum_{k=0}^{k_0} \frac{(v + \varepsilon_k)^2}{\varepsilon_k^2} + \sup_{r \geq \varepsilon} \frac{\mathbb{P}_U(x \in \Delta(2v + r))}{2v + r} \left( 2d' \ln \frac{1}{\varepsilon} + \ln \frac{1}{\delta} \right) \sum_{k=0}^{k_0} \frac{(v + \varepsilon_k)}{\varepsilon_k} \\ &\leq \tilde{O} \left( \left( \sup_{r \geq \varepsilon} \frac{\alpha(2v + r, r/1024) + r}{2v + r} \right) d \left( \frac{v^2}{\varepsilon^2} + 1 \right) + \left( \sup_{r \geq \varepsilon} \frac{\mathbb{P}_U(x \in \Delta(2v + r))}{2v + r} \right) d' \left( \frac{v}{\varepsilon} + 1 \right) \right) \end{aligned}$$

where the first inequality is by Lemma 2, the second inequality is by noticing for all  $k \geq 1$ ,  $\ln^2 \frac{1}{\varepsilon_k} + \ln^2 \frac{1}{\delta_k} \leq 3 \ln^2 \frac{1}{\varepsilon} + 2 \ln^2 \frac{1}{\delta}$  and  $d' \ln \frac{1}{\varepsilon_k} + \ln \frac{1}{\delta_k} \leq 2d' \ln \frac{1}{\varepsilon} + \ln \frac{1}{\delta}$ , the rest of the derivations follows from standard algebra.  $\square$

*Proof of Theorem 2.* Item 1 is an immediate consequence of Lemma 2, whereas item 2 is a consequence of Theorem 4.  $\square$

## C Case Study: Linear Classification under Uniform Distribution over Unit Ball

We remind the reader the setting of our example in Section 4.  $\mathcal{H}$  is the class of homogeneous linear separators on the  $d$ -dimensional unit ball and  $\mathcal{H}^{df}$  is defined to be  $\{h\Delta h' : h, h' \in \mathcal{H}\}$ . Note that  $d'$  is at most  $5d$ . Furthermore,  $U$  is the uniform distribution over the unit ball.  $O$  is a deterministic labeler such that  $\text{err}_D(h^*) = \nu > 0$ ,  $W$  is such that there exists a difference classifier  $\bar{h}^{df}$  with false negative error 0 for which  $\Pr_U(\bar{h}^{df}(x) = 1) \leq g = o(\sqrt{d\nu})$ . We prove the label complexity bound provided by Corollary 1.

*Proof of Corollary 1.* We claim that under the assumptions of Corollary 1,  $\alpha(2\nu + r, r/1024)$  is at most  $g$ . Indeed, by taking  $h^{df} = \bar{h}^{df}$ , observe that

$$P(\bar{h}^{df}(x) = -1, y_W \neq y_O, x \in \Delta(2\nu + r)) \leq P(\bar{h}^{df}(x) = -1, y_W \neq y_O) = 0$$

$$P(\bar{h}^{df}(x) = +1, x \in \Delta(2\nu + r)) \leq g$$

This shows that  $\alpha(2\nu + r, 0) \leq g$ . Hence,  $\alpha(2\nu + r, r/1024) \leq \alpha(2\nu + r, 0) \leq g$ . Therefore,

$$\sup_{r: r \geq \varepsilon} \frac{\alpha(2\nu + r, r/1024) + r}{2\nu + r} \leq \sup_{r \geq \varepsilon} \frac{g + r}{\nu + r} \leq \max\left(\frac{g}{\nu}, 1\right)$$

Recall that the disagreement coefficient  $\theta(2\nu + r) \leq \sqrt{d}$  for all  $r$ , and  $d' \leq 5d$ . Thus, by Theorem 2, the number of label queries to  $O$  is at most

$$\tilde{O}\left(d \max\left(\frac{g}{\nu}, 1\right) \left(\frac{\nu^2}{\varepsilon^2} + 1\right) + d^{3/2} \left(1 + \frac{\nu}{\varepsilon}\right)\right)$$

□

## D Performance Guarantees for Learning with Respect to Data labeled by $O$ and $W$

An interesting variant of our model is to consider learning from data labeled by a mixture of  $O$  and  $W$ .

Let  $D_W$  be the distribution over labeled examples determined by  $U$  and  $W$ , specifically,  $\mathbb{P}_{D_W}(x, y) = \mathbb{P}_U(x)\mathbb{P}_W(y|x)$ . Let  $D'$  be a mixture of  $D$  and  $D_W$ , specifically  $D' = (1 - \beta)D + \beta D_W$ , for some parameter  $\beta > 0$ . Define  $h'$  to be the best classifier with respect to  $D'$ , and denote by  $\nu'$  the error of  $h'$  with respect to  $D'$ .

Let  $O'$  be the following *mixture oracle*. Given an example  $x$ , the label  $y_{O'}$  is generated as follows.  $O'$  flips a coin with bias  $\beta$ . If it comes up heads, it queries  $W$  for the label of  $x$  and returns the result; otherwise  $O$  is queried and the result returned. It is immediate that the conditional probability induced by  $O'$  is  $P_{O'}(y|x) = (1 - \beta)\mathbb{P}_O(y|x) + \beta\mathbb{P}_W(y|x)$ , and  $D'(x, y) = P_{O'}(y|x)P_U(x)$ .

**Assumption 2.** For any  $r, \eta > 0$ , there exists an  $h_{\eta, r}^{df} \in \mathcal{H}^{df}$  with the following properties:

$$\mathbb{P}_{\mathcal{D}}(h_{\eta, r}^{df}(x) = -1, x \in \Delta(r), y_{O'} \neq y_W) \leq \eta$$

$$\mathbb{P}_{\mathcal{D}}(h_{\eta, r}^{df}(x) = 1, x \in \Delta(r)) \leq \alpha'(r, \eta)$$

Recall that the disagreement coefficient  $\theta(r)$  at scale  $r$  is  $\theta(r) = \sup_{h \in \mathcal{H}} \sup_{r' \geq r} \frac{\mathbb{P}_U(\text{DIS}(\text{B}_U(h, r'))}{r'}$ , which only depends on the unlabeled data distribution  $U$  and does not depend on  $W$  or  $O$ .

We have the following corollary.

**Corollary 2** (Learning with respect to Mixture). *Let  $d$  be the VC dimension of  $\mathcal{H}$  and let  $d'$  be the VC dimension of  $\mathcal{H}^{df}$ . If Assumption 2 holds, and if the error of the best classifier in  $\mathcal{H}$  on  $D'$  is at most  $\nu'$ . Algorithm 1 is run with inputs unlabeled distribution  $U$ , target excess error  $\varepsilon$ , confidence  $\delta$ , labeling oracle  $O'$ , weak oracle  $W$ , hypothesis class  $\mathcal{H}$ , hypothesis class for difference classifier  $\mathcal{H}^{df}$ , confidence  $\delta$ . Then with probability  $\geq 1 - 2\delta$ , the following hold:*



1. the classifier  $\hat{h}$  output by Algorithm 1 satisfies:  $\text{err}_{D'}(\hat{h}) \leq \text{err}_{D'}(h') + \varepsilon$ .
2. the total number of label queries made by Algorithm 1 to the oracle  $O$  is at most:

$$\tilde{O}\left((1-\beta)\left(\sup_{r \geq \varepsilon} \frac{\alpha'(2v' + r, r/1024) + r}{2v' + r} \cdot d\left(\frac{v'^2}{\varepsilon^2} + 1\right) + \theta(2v' + \varepsilon)d'\left(\frac{v'}{\varepsilon} + 1\right)\right)\right)$$

*Proof Sketch.* Consider running Algorithm 1 in the setting above. By Theorem 1 and Theorem 2, there is an event  $F$  such that  $\mathbb{P}(F) \geq 1 - \delta$ , if event  $F$  happens,  $\hat{h}$ , the classifier learned by Algorithm 1 is such that

$$\text{err}_{D'}(\hat{h}) \leq \text{err}_{D'}(h') + \varepsilon$$

By Theorem 2, the number of label requests to  $O'$  is at most

$$m_{O'} = \tilde{O}\left(\sup_{r \geq \varepsilon} \frac{\alpha'(2v' + r, r/1024) + r}{2v' + r} \cdot d\left(\frac{v'^2}{\varepsilon^2} + 1\right) + \theta(2v' + \varepsilon)d'\left(\frac{v'}{\varepsilon} + 1\right)\right)$$

Since  $O'$  is simulated by drawing a Bernoulli random variable  $Z_i \sim \text{Ber}(1 - \beta)$  in each call of  $O'$ , if  $Z_i = 1$ , then return  $O(x)$ , otherwise return  $W(x)$ . Define event

$$H = \left\{ \sum_{i=1}^{m_{O'}} Z_i \leq 2((1-\beta)m_{O'} + 4\ln \frac{2}{\delta}) \right\}$$

by Chernoff bound,  $\mathbb{P}(H) \geq 1 - \delta$ . Consider event  $J = F \cap H$ , by union bound,  $\mathbb{P}(J) \geq 1 - 2\delta$ . Conditioned on event  $J$ , the number of label requests to  $O$  is at most  $\sum_{i=1}^{m_{O'}} Z_i$ , which is at most

$$\tilde{O}\left((1-\beta)\left(\sup_{r \geq \varepsilon} \frac{\alpha'(2v' + r, r/1024) + r}{2v' + r} \cdot d\left(\frac{v'^2}{\varepsilon^2} + 1\right) + \theta(2v' + \varepsilon)d'\left(\frac{v'}{\varepsilon} + 1\right)\right)\right)$$

□

## E Remaining Proofs

*Proof of Fact 2.* (1) First by Lemma 1,  $\mathbb{P}_{\mathcal{D}}(x \in R_{k-1})/2 \leq \hat{p}_k \leq \mathbb{P}_{\mathcal{D}}(x \in R_{k-1})$  holds with probability  $1 - \delta_k/6$ .

Second, for each classifier  $h^{df} \in \mathcal{H}^{df}$ , define functions  $f_{h^{df}}^1$ , and  $f_{h^{df}}^2$  associated with it. Formally,

$$f_{h^{df}}^1(x, y_O, y_W) = I(h^{df}(x) = -1, y_O \neq y_W)$$

$$f_{h^{df}}^2(x, y_O, y_W) = I(h^{df}(x) = +1)$$

Consider the function class  $\mathcal{F}^1 = \{f_{h^{df}}^1 : h^{df} \in \mathcal{H}^{df}\}$ ,  $\mathcal{F}^2 = \{f_{h^{df}}^2 : h^{df} \in \mathcal{H}^{df}\}$ . Note that both  $\mathcal{F}^1$  and  $\mathcal{F}^2$  have VC dimension  $d'$ , which is the same as  $\mathcal{H}^{df}$ . We note that  $\mathcal{S}_k'$  is a random sample of size  $m_k$  drawn iid from  $\mathcal{S}_k$ . The fact follows from normalized VC inequality on  $\mathcal{F}^1$  and  $\mathcal{F}^2$  and the choice of  $m_k$  in Algorithm 2 called in epoch  $k$ , along with union bound. □

*Proof of Fact 3.* For fixed  $t$ , we note that  $\mathcal{S}_k^t$  is a random sample of size  $2^t$  drawn iid from  $D$ . By Equation (8), for any fixed  $t \in \mathbb{N}$ ,

$$\mathbb{P}\left(\text{for all } h, h' \in \mathcal{H}, |(\text{err}(h, \mathcal{S}_k^t) - \text{err}(h', \mathcal{S}_k^t)) - (\text{err}_D(h) - \text{err}_D(h'))| \leq \sigma(2^t, \delta_k^t) + \sqrt{\sigma(2^t, \delta_k^t) \rho_{\mathcal{S}_k^t}(h, h')}\right) \geq 1 - \delta_k^t/8 \quad (36)$$

Meanwhile, for fixed  $t \in \mathbb{N}$ , note that  $\hat{\mathcal{S}}_k^t$  is a random sample of size  $2^t$  drawn iid from  $\hat{D}_k$ . By Equation (8),

$$\mathbb{P}\left(\text{for all } h, h' \in \mathcal{H}, \text{err}(h, \hat{\mathcal{S}}_k^t) - \text{err}_{\hat{D}_k}(h) \leq \sigma(2^t, \delta_k^t) + \sqrt{\sigma(2^t, \delta_k^t) \text{err}_{\hat{D}_k}(h)}\right) \geq 1 - \delta_k^t/8 \quad (37)$$

Moreover, for fixed  $t \in \mathbb{N}$ , note that  $\mathcal{S}_k^t$  is a random sample of size  $2^t$  drawn iid from  $\mathcal{D}$ . By Equation (12),

$$\mathbb{P}\left(\mathbb{P}_{\mathcal{S}_k^t}(\hat{h}_k^{df}(x) = -1, y_O \neq y_W, x \in R_{k-1}) \leq \mathbb{P}_{\mathcal{D}}(\hat{h}_k^{df}(x) = -1, y_O \neq y_W, x \in R_{k-1})\right)$$

$$+ \sqrt{\gamma(2^t, \delta_k^t) \mathbb{P}_{\mathcal{D}}(\hat{h}_k^{df}(x) = -1, y_O \neq y_W, x \in R_{k-1}) + \gamma(2^t, \delta_k^t)} \geq 1 - \delta_k^t/8 \quad (38)$$

Finally, for fixed  $t \in N$ , note that  $\mathcal{S}_k^t$  is a random sample of size  $2^t$  drawn iid from  $\mathcal{D}$ . By Equation (12),

$$\mathbb{P}\left(\mathbb{P}_{\mathcal{S}_k^t}(\hat{h}_k^{df}(x) = -1, x \in R_{k-1}) \leq \mathbb{P}_{\mathcal{D}}(\hat{h}_k^{df}(x) = -1, x \in R_{k-1}) + \sqrt{\mathbb{P}_{\mathcal{D}}(\hat{h}_k^{df}(x) = -1, x \in R_{k-1})\gamma(2^t, \delta_k^t)} + \gamma(2^t, \delta_k^t)\right) \geq 1 - \delta_k^t/8 \quad (39)$$

Note that by algebra,

$$\mathbb{P}_{\mathcal{D}}(\hat{h}_k^{df}(x) = -1, x \in R_{k-1}) + \sqrt{\mathbb{P}_{\mathcal{D}}(\hat{h}_k^{df}(x) = -1, x \in R_{k-1})\gamma(2^t, \delta_k^t)} + \gamma(2^t, \delta_k^t) \leq 2(\mathbb{P}_{\mathcal{D}}(\hat{h}_k^{df}(x) = -1, x \in R_{k-1}) + \gamma(2^t, \delta_k^t))$$

Therefore,

$$\mathbb{P}\left(\mathbb{P}_{\mathcal{S}_k^t}(\hat{h}_k^{df}(x) = -1, x \in R_{k-1}) \leq 2(\mathbb{P}_{\mathcal{D}}(\hat{h}_k^{df}(x) = -1, x \in R_{k-1}) + \gamma(2^t, \delta_k^t))\right) \geq 1 - \delta_k^t/12 \quad (40)$$

The proof follows by applying union bound over Equations (36), (37), (38) and (40) and  $t \in \mathbb{N}$ .  $\square$

We emphasize that  $\mathcal{S}_k^t$  is chosen iid at random after  $\hat{h}_k^{df}$  is determined, thus uniform convergence argument over  $\mathcal{H}^{df}$  is not necessary for Equations (38) and (40).

*Proof of Fact 4.* By induction on  $k$ .

**Base Case.** For  $k = 0$ , it follows directly from normalized VC inequality that  $\mathbb{P}(F_0) \geq 1 - \delta_0$ .

**Inductive Case.** Assume  $\mathbb{P}(F_{k-1}) \geq 1 - \delta_0 - \dots - \delta_{k-1}$  holds. By union bound,

$$\mathbb{P}(F_k) \geq \mathbb{P}(F_{k-1} \cap E_k^1 \cap E_k^2) \geq \mathbb{P}(F_{k-1}) - \delta_k/2 - \delta_k/2 \geq \mathbb{P}(F_{k-1}) - \delta_k$$

Hence,  $\mathbb{P}(F_k) \geq 1 - \delta_0 - \dots - \delta_k$ . This finishes the induction.

In particular,  $\mathbb{P}(F_{k_0}) \geq 1 - \delta_0 - \dots - \delta_{k_0} \geq 1 - \delta$ .  $\square$
